# Supplementary material for: External Evaluation of Population Pharmacokinetic Models and Bayes-Based Dosing of Infliximab
Source: Pharmaceutics. 2021 Aug 3;13(8):1191. doi: 10.3390/pharmaceutics13081191 (PMC8398005; doi:10.3390/pharmaceutics13081191)
Supplement: Supplementary file 1 [file pharmaceutics-13-01191-s001.zip › pharmaceutics-1312561-SM.pdf]

# Supplementary Materials: External Evaluation of Population Pharmacokinetic Models and Bayes-Based Dosing of Infliximab

Celine Konecki, Catherine Feliu, Yoann Cazaubon, Delphine Giusti, Marcelle Tonye-Libyh Hedia Brix, Guillaume Cadiot, Amélie Biron and Zoubir Djerada

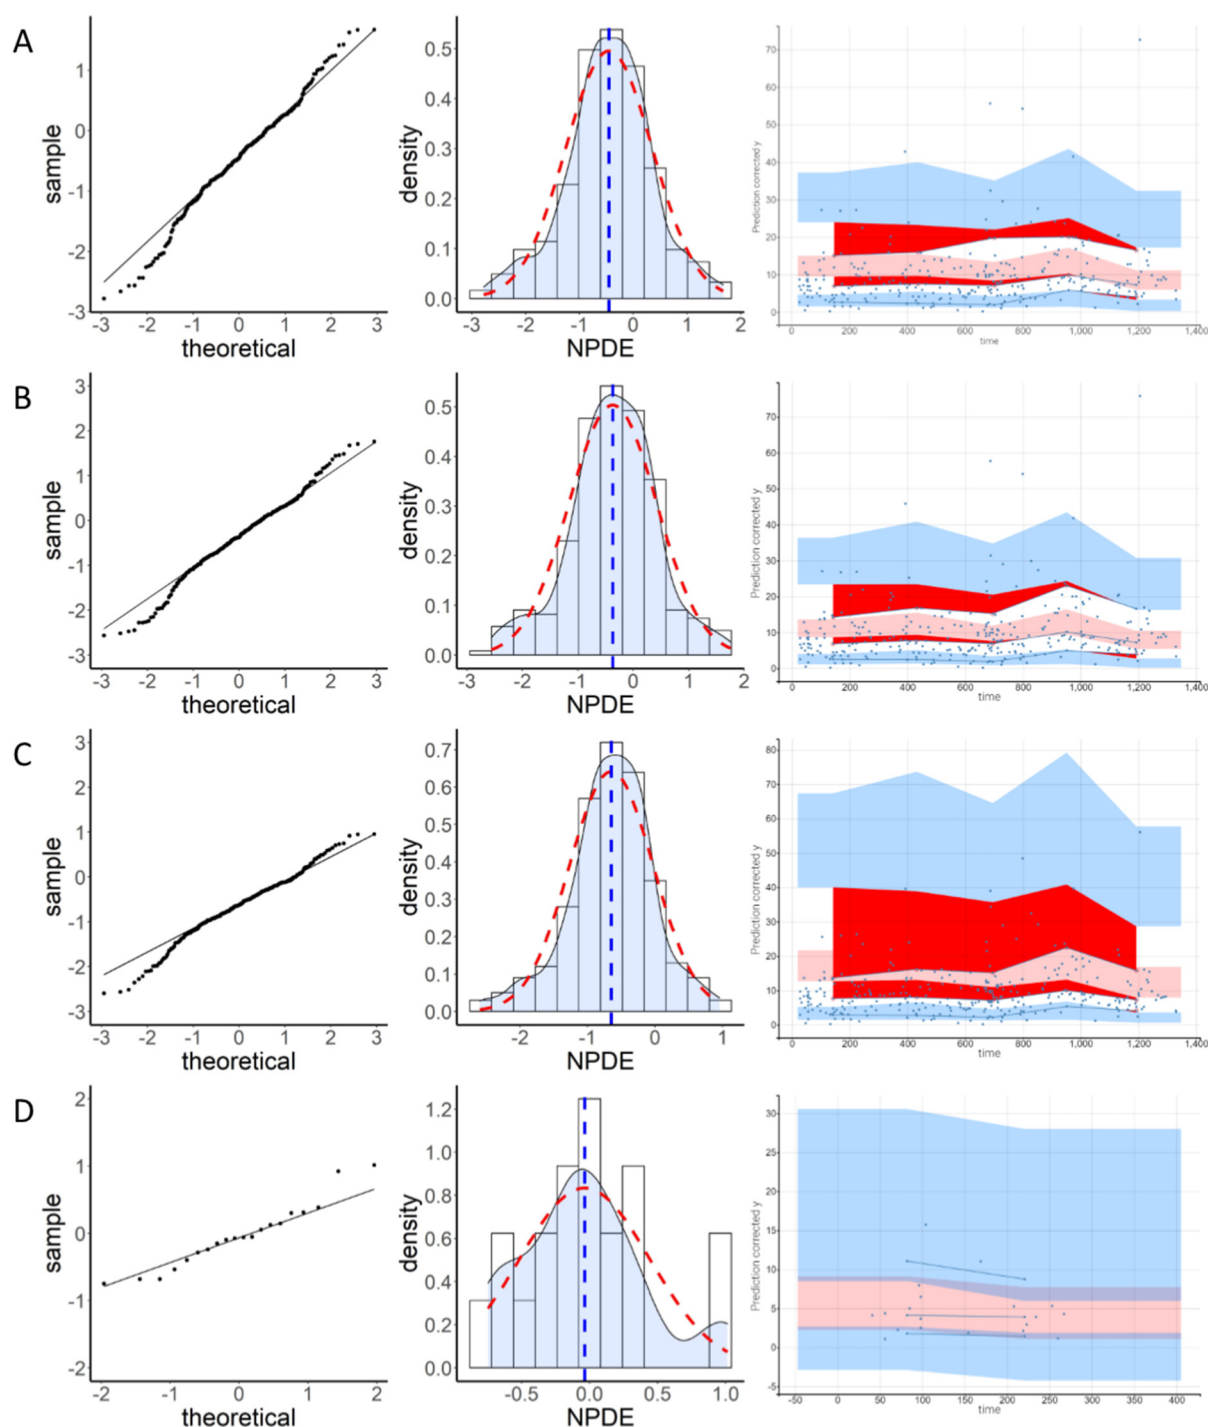

Figure S1 (continued)

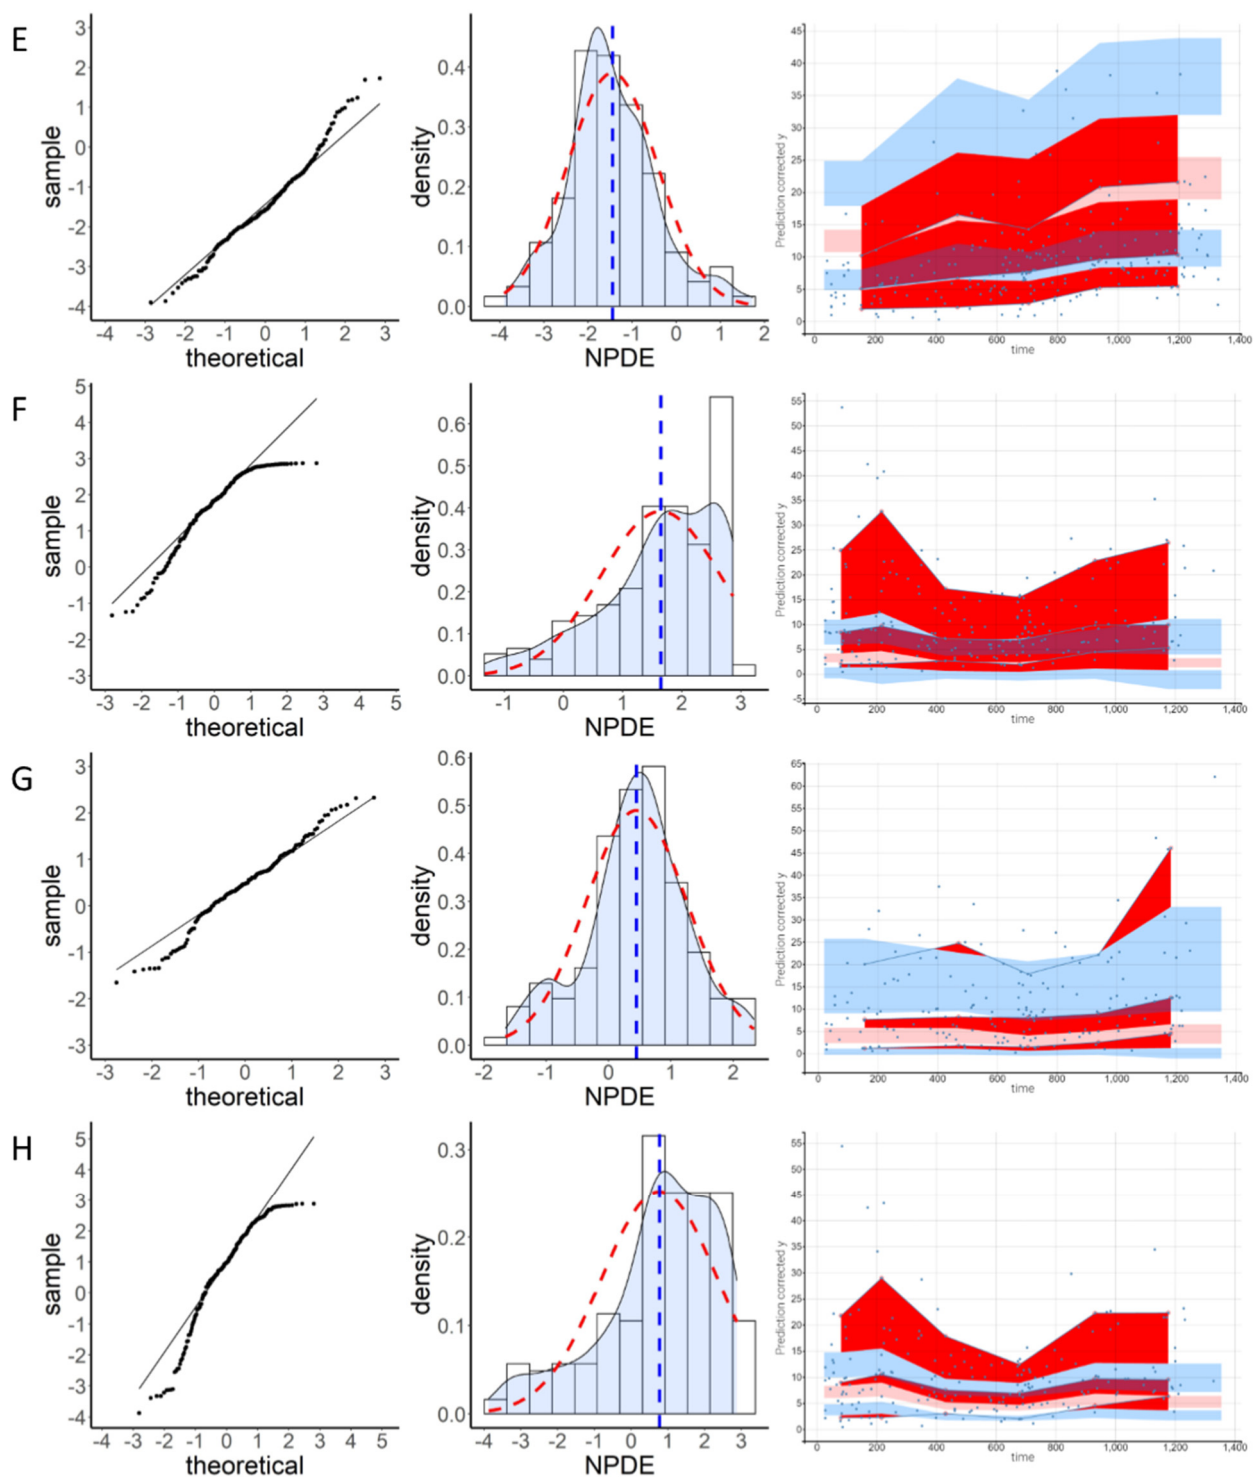

**Figure S1.** Distribution of NPDE and pcVPC for the 8 evaluated models, covariates not taken into account. On the left, quantile-quantile graph of the NPDEs vs. theoretical normal distribution. In the middle, histogram and density of the NPDE distribution (blue dashed lines: mean; red dashed lines: density of the normal distribution). On the right, pcVPC (blue dots: observed concentrations; blue lines: 10th, 50th and 90th percentiles of observed concentrations; blue areas: prediction intervals of the 10th and 90th percentiles; light red area: prediction interval of the median; dark red area: outliers).

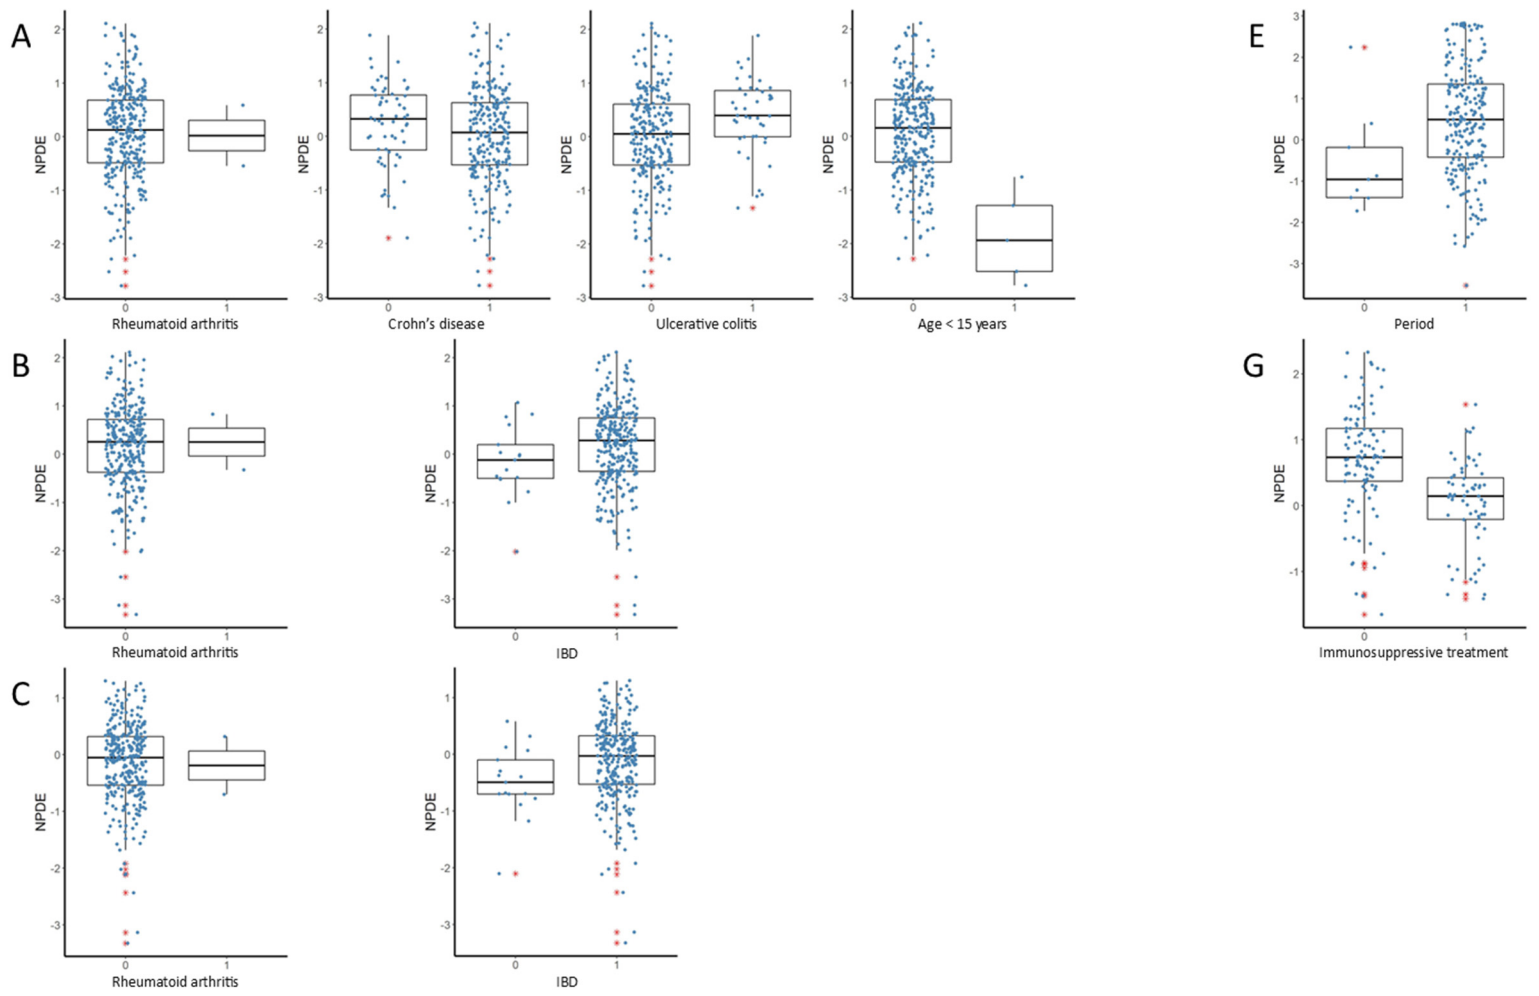

**Figure S2.** Boxplot of NPDEs according to several categorical covariates for the 8 evaluated models.

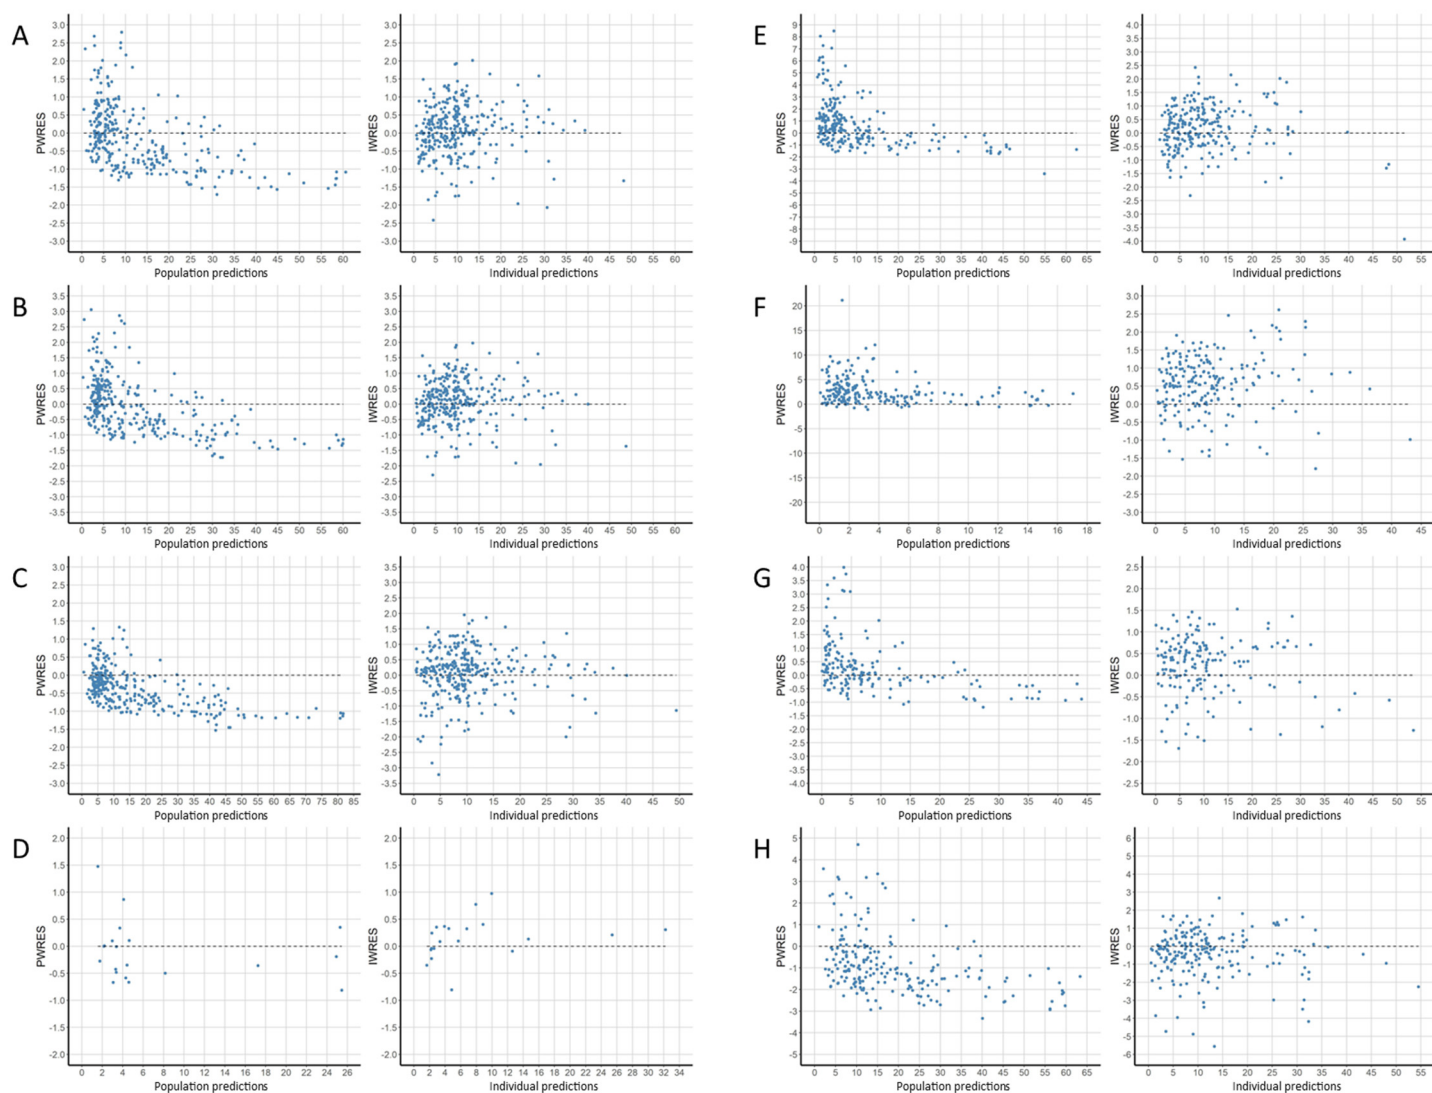

**Figure S3.** Evolution of residuals according to predictions: PWRES against PPRED and IWRES against IPRED. PWRES: Population Weighted Residuals, PPRED: population predictions, IWRES: Individual Weighted Residuals, IPRED: individual predictions

**Table S1.** Characteristics of models not selected for external evaluation.

| Model                                                    | I                                                                                                                                        | J                                                                                                                                                              | K                                                                                   |
|----------------------------------------------------------|------------------------------------------------------------------------------------------------------------------------------------------|----------------------------------------------------------------------------------------------------------------------------------------------------------------|-------------------------------------------------------------------------------------|
| Reference                                                | Fasanmade et al. 2009                                                                                                                    | Dreesen et al. 2018                                                                                                                                            | Ternant et al. 2014a                                                                |
| Patients                                                 | 728 patients with UC                                                                                                                     | 204 patients with UC                                                                                                                                           | 111 patients with Crohn's disease                                                   |
| Infliximab measurement                                   | 4,310 peak and trough concentrations measured by ELISA                                                                                   | 583 trough IFX and AAI concentrations measured by ELISA                                                                                                        | 546 concentrations measured by ELISA                                                |
| Tested covariates                                        | Age, WT, sex, race, renal function, liver function, CRP, ALB, total protein, hematology parameters, immunomodulator use, Mayo score, AAI | WT, FFM, sex, age, disease duration, concomitant CS and thiopurines at baseline, MES at baseline, pancolitis at baseline, time-varying CRP and ALB             | Age, weight, hemoglobin level, WBC count, liver function, CRP, sex, FCGR3A genotype |
| Clearance(s) (L/day) or elimination rate constant (/day) | $CL = 0.407 \times \left(\frac{ALB}{41}\right)^{-1.54} \times 1.471AAI \times 0.764Sex$<br>Q = 7.14                                      | $Ke = (0.0521 \times MES1 + 0.0543 \times MES2 + 0.0667 \times MES3) \times \left(\frac{ALB}{42}\right)^{-0.808} \times \left(\frac{CRP}{6.1}\right)^{0.0859}$ | $CL = 0.286 \times e^{0.15 \times FCGR3A} \times e^{0.055 \times CRP}$              |
| Distribution volume(s) (L)                               | $V1 = 3.29 \times \left(\frac{WT}{77}\right)^{0.538} \times 0.863Sex$<br>V2 = 4.13                                                       | $V = 6.34 \times 1.33 \times CS \times 1.23 \times PANC \times \left(\frac{FFM}{52}\right)^{0.544}$                                                            | V = 6.1                                                                             |
| Residual error model                                     | Combined error<br>$\sigma_{add} = 0.0413 \text{ mg/L}$ ; $\sigma_{prop} = 40.3\%$                                                        | Combined error<br>$\sigma_{add} = 0.09 \text{ mg/L}$ ; $\sigma_{prop} = 3.62\%$                                                                                | Proportional error<br>$\sigma_{prop} = 41\%$                                        |
| Software (algorithm)                                     | NONMEM (FOCE-I)                                                                                                                          | NONMEM                                                                                                                                                         | Monolix (SAEM)                                                                      |

Table S1 (continued)

| Model                      | L                                                                                                                                                                                                                      | M                                                                                                                                                                         | N                                                                                               |
|----------------------------|------------------------------------------------------------------------------------------------------------------------------------------------------------------------------------------------------------------------|---------------------------------------------------------------------------------------------------------------------------------------------------------------------------|-------------------------------------------------------------------------------------------------|
| Reference                  | Brandse et al. 2017                                                                                                                                                                                                    | Kevans et al. 2018                                                                                                                                                        | Ternant et al. 2008                                                                             |
| Patients                   | 332 patients with IBD                                                                                                                                                                                                  | 51 patients with IBD                                                                                                                                                      | 33 patients with IBD                                                                            |
| Infliximab measurement     | 997 concentrations measured by ELISA (Sanquin Laboratory), 81% residuals                                                                                                                                               | IFX and AAI concentrations measured by the Anser™ IFX assay (Prometheus®)                                                                                                 | 478 trough and peak IFX concentrations measured by ELISA (in-house)                             |
| Tested covariates          | Age, sex, length, weight, smoking, type, duration, location and behaviour of disease, immunomodulator use, selected laboratory values, previous anti-TNF exposure                                                      | WT, ALB, CRP, time from initiation of IFX therapy, AAI, concomitant immunomodulators                                                                                      | Age, WT, sex, disease, concomitant immunosuppressive treatment, AAI                             |
| Clearance(s) (L/day)       | $CL = 0.359 \times \left(\frac{WT}{72.3}\right)^{0.523} \times \left(\frac{ALB}{35.2}\right)^{-1.38} \times e^{0.0521} \times PE \times e^{0.601 \times AAI}$ $Q = 0.0697 \times \left(\frac{WT}{72.3}\right)^{0.523}$ | $CL = 0.368 \times \left(\frac{WT}{61}\right)^{0.709} \times \left(\frac{ALB}{34}\right)^{-0.445} \times 0.0373 AAI$ $Q = 0.308 \times \left(\frac{WT}{61}\right)^{1.52}$ | $CL = 0.032 \times AAI + 0.012 \times (1 - AAI)$ $Q = 0.0054$                                   |
| Distribution volume(s) (L) | $V1 = 4.72 \times \left(\frac{WT}{72.3}\right)^{0.473}$ $V2 = 2.4 \times \left(\frac{WT}{72.3}\right)^{0.473}$                                                                                                         | $V1 = 3.33 \times \left(\frac{WT}{61}\right)^{0.64}$ $V2 = 3.42 \times \left(\frac{WT}{61}\right)^{0.991}$                                                                | $V1 = 2.3 \times Sex + 1.1 \times (1 - Sex) + 1.7 \times \left(\frac{WT}{67}\right)$ $V2 = 1.9$ |
| Residual error model       | Not specified                                                                                                                                                                                                          | Proportional error<br>$\sigma_{prop} = 28.5\%$                                                                                                                            | Additive error<br>$\sigma_{add} = 1.04 \text{ mg/L}$                                            |
| Software (algorithm)       | NONMEM                                                                                                                                                                                                                 | NONMEM (FOCE)                                                                                                                                                             | Winnonmix (conditional first-order method)                                                      |

Table S1 (continued)

| Model                      | O                                                                                                          | P                                                                                                               | Q                                                                                                                                                          | R                                                                                                                                                   |
|----------------------------|------------------------------------------------------------------------------------------------------------|-----------------------------------------------------------------------------------------------------------------|------------------------------------------------------------------------------------------------------------------------------------------------------------|-----------------------------------------------------------------------------------------------------------------------------------------------------|
| Reference                  | Xu et al. 2008                                                                                             | Ternant et al. 2012                                                                                             | Palaparthi et al. 2019                                                                                                                                     | Ternant et al. 2014b                                                                                                                                |
| Patients                   | 247 patients with ankylosing spondylitis                                                                   | 26 patients with ankylosing spondylitis                                                                         | 649 patients with rheumatoid arthritis                                                                                                                     | 84 patients with rheumatoid arthritis                                                                                                               |
| Infliximab measurement     | 8137 peak and trough concentrations, measured by ELISA                                                     | 507 peak and trough concentrations, measured by ELISA                                                           | 4881 concentrations, measured by ELISA                                                                                                                     | 412 concentrations, measured by ELISA                                                                                                               |
| Tested covariates          | Sex, BSA, disease activity, renal function, WBC, concomitant treatments                                    | Sex, methotrexate, age, height, weight, BSA                                                                     | Age, BSA, weight, sex, race, ethnicity, albumin, CRP, rheumatoid factor, WBC count, antibodies against infliximab, previous biologic use methotrexate dose | Sex, association with MTX and/or corticosteroids, age, weight, height, disease duration, infliximab treatment duration, CRP, disease activity score |
| Clearance(s) (L/day)       | $CL = (0.273 + (GB - 7.9) \times 0.0106) \times (1 + RF \times 0.419)$<br>Q = 3.06                         | CL = 0.21<br>Q = 2.3                                                                                            | $CL = 0.015 \times AAI0.478 \times e^{0.255 \times \text{Sex}}$<br>Q = 0.2                                                                                 | $CL = 0.019 \times e^{-0.36 \times MTX \times \left(\frac{CRP}{3.2}\right)^{0.12}}$<br>Q = 0.18                                                     |
| Distribution volume(s) (L) | $V1 = 3.06 \times \left(\frac{BSA}{1.94}\right)^{0.744} \times (1 - \text{sex} \times 0.100)$<br>V2 = 2.94 | $V1 = 2.3 \times \left(\frac{BSA}{1.89}\right)^{0.88}$<br>$V2 = 1.8 \times \left(\frac{BSA}{1.89}\right)^{1.9}$ | $V1 = 3.57 \times \left(\frac{WT}{70}\right)^{0.669}$<br>V2 = 1.65                                                                                         | $V1 = 2.3 \times \left(\frac{WT}{65}\right)^{1.2}$<br>V2 = 3.6                                                                                      |
| Residual error model       | Combined error<br>$\sigma_{\text{add}} = 2.89 \text{ mg/L}$ ; $\sigma_{\text{prop}} = 22.9\%$              | Combined error<br>$\sigma_{\text{add}} = 2.6 \text{ mg/L}$ ; $\sigma_{\text{prop}} = 18\%$                      | Proportional error<br>$\sigma_{\text{prop}} = 77.0\%$                                                                                                      | Combined error<br>$\sigma_{\text{add}} = 0.15 \text{ mg/L}$ ; $\sigma_{\text{prop}} = 16\%$                                                         |
| Software (algorithm)       | NONMEM (FOCE)                                                                                              | MONOLIX (SAEM)                                                                                                  | NONMEM                                                                                                                                                     | MONOLIX (SAEM)                                                                                                                                      |

UC: ulcerative colitis, IBD: inflammatory bowel disease, IFX: infliximab, ELISA: enzyme-linked immunosorbent assay, CRP: C-reactive protein, ALB: albumin, AAI: antibody against infliximab, WT: weight, PE: previous anti-TNF exposure, WBC: white blood cells, RF: renal failure, BSA: body surface area, FFM: fat free mass, CS: corticosteroids, MES: Mayo endoscopic subscore, BMI: body mass index, PANC: pancolitis.

**Table S2.** Characteristics of the evaluation population and the construction population for model A

| Characteristic                                  | Evaluation population | Construction population |
|-------------------------------------------------|-----------------------|-------------------------|
| Number of patients                              | 135                   | 218                     |
| Number of infliximab samples                    | 303                   | 870                     |
| Females                                         | 66 (49%)              | 141 (65%)               |
| > 15 years old                                  | 133 (99%)             | 207 (95%)               |
| Weight (kg)                                     | 70 [29-150]           | 67 [28.2-125]           |
| Disease                                         |                       |                         |
| - Crohn's disease                               | 101 (75%)             | 63 (29%)                |
| - Ankylosing spondylitis or psoriatic arthritis | 12 (9%)               | 121 (56%)               |
| - Ulcerative colitis                            | 20 (15%)              | 16 (7%)                 |
| - Rheumatoid arthritis                          | 2 (1%)                | 18 (8%)                 |

**Table S3.** Characteristics of the evaluation population and the construction population for models B and C

| Characteristic                                            | Evaluation population | Construction population |
|-----------------------------------------------------------|-----------------------|-------------------------|
| Number of patients                                        | 140                   | 143                     |
| Number of infliximab samples                              | 310                   | Not specified           |
| Females                                                   | 66 (47%)              | 49 (34%)                |
| Weight (kg)                                               | 72.5 [29-150]         | 67 [56-80]              |
| Disease                                                   |                       |                         |
| - Crohn's disease or ulcerative colitis                   | 126 (90%)             | 50 (35%)                |
| - Ankylosing spondylitis or psoriatic arthritis           | 12 (9%)               | 80 (56%)                |
| - Rheumatoid arthritis                                    | 2 (1%)                | 13 (9%)                 |
| Methotrexate use among patients with rheumatoid arthritis | 21 (15%)              | 8 (1%)                  |

**Table S4.** Characteristics of the evaluation population and the construction population for model D

| Characteristic               | Evaluation population | Construction population |
|------------------------------|-----------------------|-------------------------|
| Number of patients           | 19                    | 133                     |
| Number of infliximab samples | 20                    | Not specified           |
| Females                      | 15 (79%)              | 79 (59%)                |
| Weight (kg)                  | 65 [43-110]           | 60 [41-120]             |

**Table S5.** Characteristics of the evaluation population and the construction population for model E

| Characteristic                | Evaluation population | Construction population |
|-------------------------------|-----------------------|-------------------------|
| Number of patients            | 95                    | 42                      |
| Number of infliximab samples  | 238                   | 188                     |
| Females                       | 52 (55%)              | 22 (52%)                |
| Harvey Bradshaw Index         | 1 [0-12]              | 6 [3-24]                |
| Antibodies against infliximab | 2 (2%)                | 2 (5%)                  |

**Table S6.** Characteristics of the evaluation population and the construction population for model F

| Characteristic                | Evaluation population | Construction population |
|-------------------------------|-----------------------|-------------------------|
| Number of patients            | 101                   | 54                      |
| Number of infliximab samples  | 206                   | 169                     |
| Weight (kg)                   | 71 [29-150]           | 70 [40-112]             |
| Albumin (mg/L)                | 42.5 [21-50]          | 40 [21-50]              |
| Antibodies against infliximab | 5 (5%)                | 17 (31%)                |

**Table S7.** Characteristics of the evaluation population and the construction population for model G

| Characteristic                | Evaluation population | Construction population |
|-------------------------------|-----------------------|-------------------------|
| Number of patients            | 90                    | 692                     |
| Number of infliximab samples  | 176                   | 5757                    |
| Weight (kg)                   | 68.5 [29-150]         | 64.5 [20.4-157.3]       |
| Albumin (mg/L)                | 42.5 [21-50]          | 41 [20-55]              |
| Antibodies against infliximab | 5 (6%)                | 67 (9.7%)               |

**Table S8.** Characteristics of the evaluation population and the construction population for model H

| Characteristic                | Evaluation population | Construction population |
|-------------------------------|-----------------------|-------------------------|
| Number of patients            | 101                   | 788                     |
| Number of infliximab samples  | 206                   | Not specified           |
| Weight (kg)                   | 71 [29-150]           | 70                      |
| Albumin (mg/L)                | 42.5 [21 -50]         | 30                      |
| Antibodies against infliximab | 5 (5%)                | Not specified           |

**Table S9.** Mean, variance and results of normality and symmetry tests of the NDPE distribution for the 8 evaluated models, covariates not taken into account.

| Model | Mean   | p       | Variance | p       | Normality (p) | Symmetry (p) |
|-------|--------|---------|----------|---------|---------------|--------------|
| A     | −0.453 | <0.0001 | 1.371    | 0.0010  | 0.0179        | 0.9380       |
| B     | −0.369 | <0.0001 | 1.660    | <0.0001 | 0.0085        | 0.9811       |
| C     | −0.649 | <0.0001 | 2.502    | <0.0001 | 0.0012        | 0.3273       |
| D     | −0.038 | 0.5706  | 4.149    | 0.0006  | 0.3287        | 0.6925       |
| E     | −1.449 | <0.0001 | 0.901    | 0.2923  | 0.0018        | 0.0135       |
| F     | 1.646  | <0.0001 | 0.987    | 0.8851  | <0.0001       | 0.0005       |
| G     | 0.447  | <0.0001 | 1.551    | 0.0004  | 0.0431        | 0.1902       |
| H     | 0.772  | <0.0001 | 0.426    | <0.0001 | <0.0001       | 0.0156       |

Wilcoxon's test for the comparison of the NPDE mean to 0, Fisher's test for the comparison of the variance to 1, Shapiro-Wilk's test for testing the hypothesis of normality.
